# Supplementary material for: Enhancing the photoelectrochemical activity of monoclinic BiVO4by discretizing oxygen vacancies: insights from DFT calculations
Source: Royal Society of Chemistry journal article supplement (doi:10.1039/d3cp02066e), 2023-01-01
Supplement: d3cp02066e1.pdf [file d3cp02066e1.pdf]

Supporting Information for:

# Enhancing the photoelectrochemical activity of monoclinic BiVO<sub>4</sub> by discretizing oxygen vacancies: insights from DFT calculations

Shuyi Li,<sup>#</sup> Xiaodan Yan,<sup>#</sup> Jinlu He\*

*College of Chemistry and Chemical Engineering, Inner Mongolia University, Hohhot*

*010021, PR China*

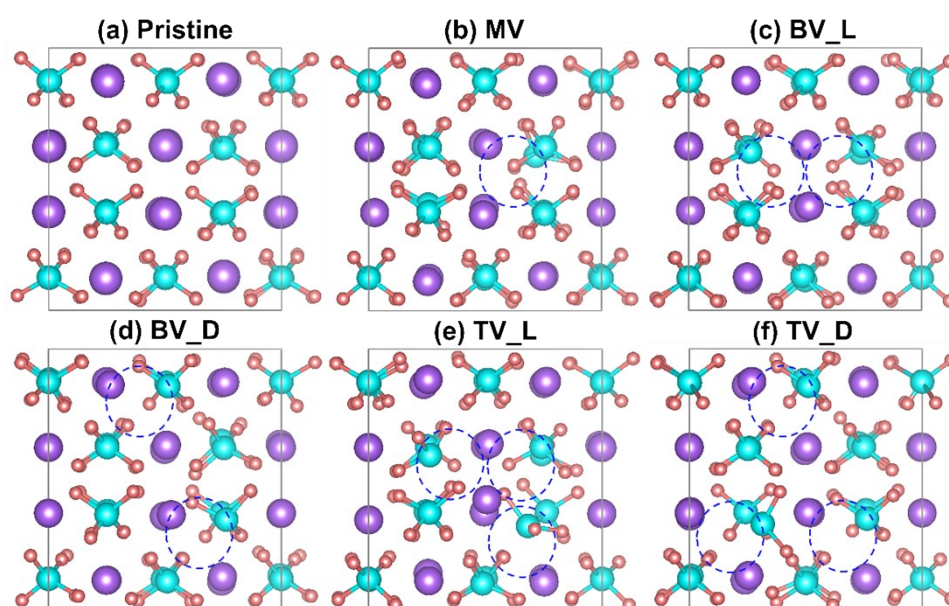

**Fig. S1.** Top view of the representative structures of the 3 ps MD trajectories.. (a) Pristine BiVO<sub>4</sub>, (b) MV, (c) BV\_L, (d) BV\_D, (e) TV\_L, (e) TV\_D. The purple, cyan, and coral balls represent Bi, V, and O atoms, respectively. The oxygen vacancy positions are circled with a dotted line.

\* Corresponding author, E-mail: hejinlu@imu.edu.cn

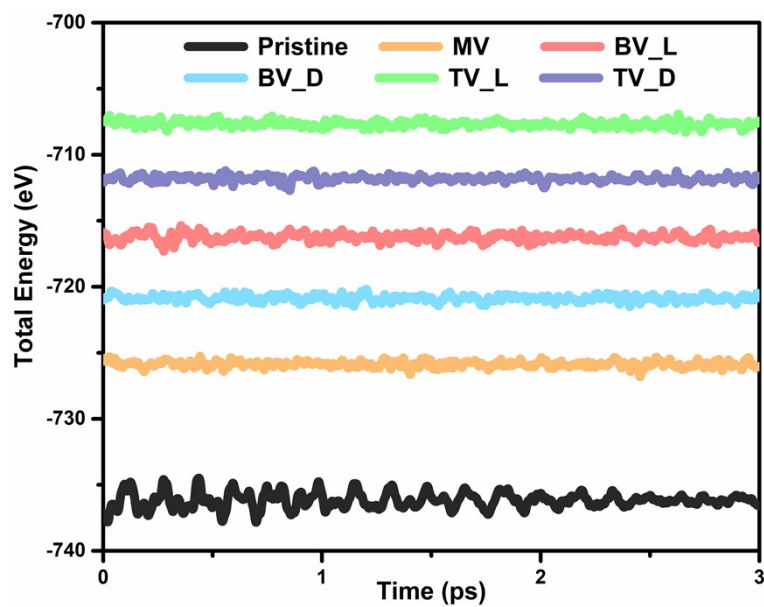

**Fig. S2.** Time-dependent total energies of the 3 ps MD trajectories for pristine BiVO<sub>4</sub>, MV, BV\_L, BV\_D, TV\_L, TV\_D systems at room temperature.

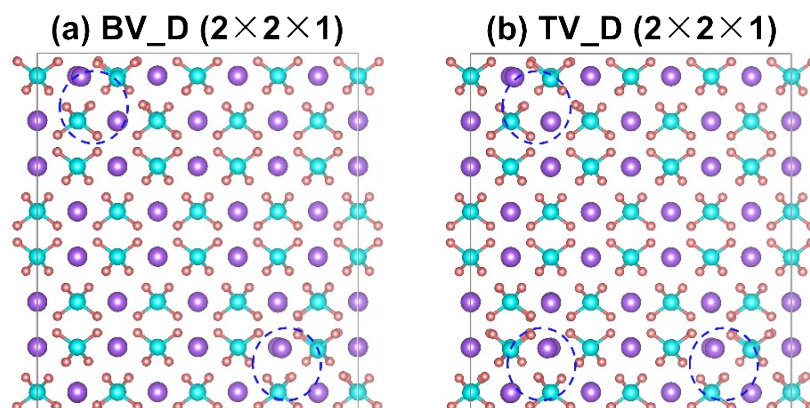

**Fig. S3.** Top view of the optimized geometries. (a) BV\_D ( $2\times 2\times 1$ ), (b) TV\_D ( $2\times 2\times 1$ ).

The purple, cyan, and coral balls represent Bi, V, and O atoms, respectively. The oxygen vacancy positions are circled with a dotted line.

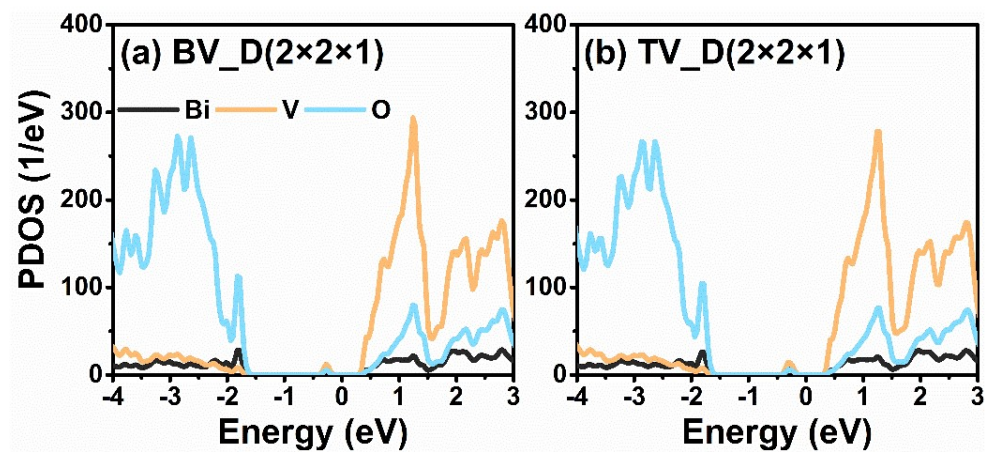

**Fig. S4.** Projected density of states (PDOS) calculated using the PBE function. (a) BV\_D ( $2\times 2\times 1$ ), (b) TV\_D ( $2\times 2\times 1$ ). The Fermi level is set to zero.

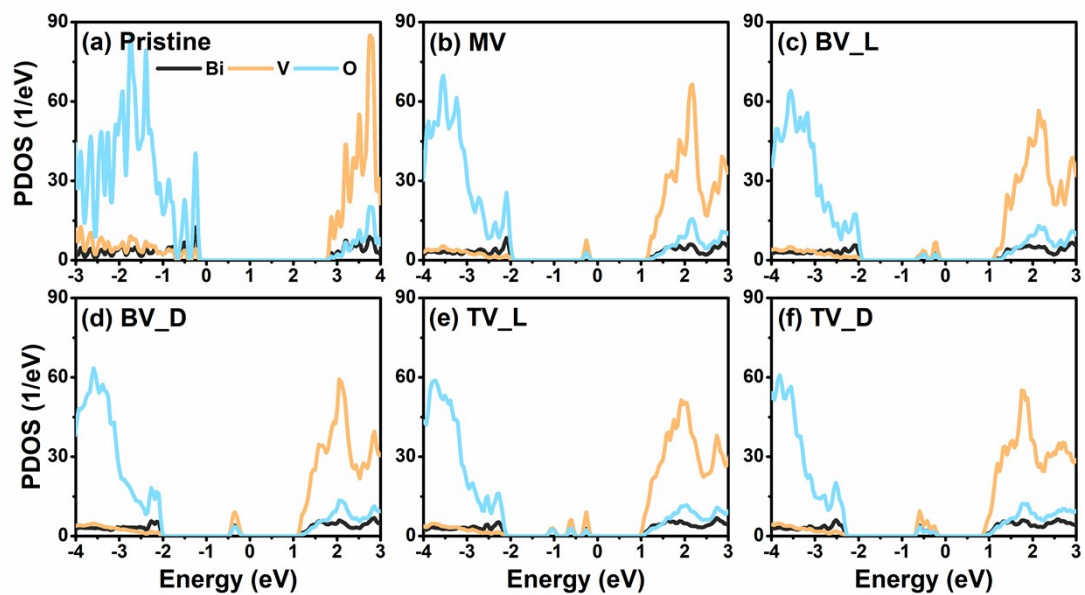

**Fig. S5.** Projected density of states (PDOS) calculated using the HSE06 function. (a) Pristine  $\text{BiVO}_4$ , (b) MV, (c) BV\_L, (d) BV\_D, (e) TV\_L, (f) TV\_D. The Fermi level is set to zero.
